# Supplementary material for: Bioactive metabolites of edible mushrooms efficacious against androgenic alopecia: Targeting SRD5A2 using computational approach
Source: Research Square preprint supplement (doi:10.21203/rs.3.rs-1458282/v1), 2022-03-17
Supplement: Supplementary file 1 [file b4d8d32c9b258d7a09f4ca34.xlsx]

## Sheet: Sheet1
Supplementary Table: 2 ADME analysis of mushroom bioactive metabolites
Metabolites Name	Molecule Number	Canonical SMILES	Formula	PubChem_CID	MW	#Heavy atoms	#Aromatic heavy atoms	Fraction Csp3	#Rotatable bonds	#H-bond acceptors	#H-bond donors	MR	TPSA	iLOGP	XLOGP3	WLOGP	MLOGP	Silicos-IT Log P	Consensus Log P	ESOL Log S	ESOL Solubility (mg/ml)	ESOL Solubility (mol/l)	ESOL Class	Ali Log S	Ali Solubility (mg/ml)	Ali Solubility (mol/l)	Ali Class	Silicos-IT LogSw	Silicos-IT Solubility (mg/ml)	Silicos-IT Solubility (mol/l)	Silicos-IT class	GI absorption	BBB permeant	Pgp substrate	CYP1A2 inhibitor	CYP2C19 inhibitor	CYP2C9 inhibitor	CYP2D6 inhibitor	CYP3A4 inhibitor	log Kp (cm/s)	Lipinski #violations	Ghose #violations	Veber #violations	Egan #violations	Muegge #violations	Bioavailability Score	PAINS #alerts	Brenk #alerts	Leadlikeness #violations
Lentinan	Molecule 1	OCC1OC(OC2C(O)C(O)OC(C2O)COC2OC(CO)C(C(C2O)O)O)C(C(C1O)OC1OC(CO)C(C(C1O)OC1OC(COC2OC(CO)C(C(C2O)O)O)C(C(C1O)OC1OC(CO)C(C(C1O)O)O)O)O)O	C42H72O36	37723	1153	78	0	1	19	36	23	230.04	585.28	0.76	-13.26	-16.28	-13.82	-14.84	-11.49	2.62	480000	416	Highly soluble	1.92	95400	82.8	Highly soluble	13.46	3.35e+16	29000000000000	Soluble	Low	No	Yes	No	No	No	No	No	-22.75	3	4	2	1	6	0.17	0	0	2
beta-Glucan	Molecule 2	OCC1OC(OC2C(CO)OC(C(C2O)O)O)C(C(C1OC1OC(CO)C(C(C1O)O)O)O)O	C18H32O16	439262	504.44	34	0	1	7	16	11	100.5	268.68	-0.26	-6.88	-7.57	-6.15	-6.49	-5.47	1.83	34000	67.4	Highly soluble	1.95	44500	88.3	Highly soluble	6	508000000	1010000	Soluble	Low	No	Yes	No	No	No	No	No	-14.26	3	2	1	1	4	0.17	0	0	1
ascorbic acid or vitamin C	Molecule 3	OCC(C1OC(=O)C(=C1O)O)O	C6H8O6	54670067	176.12	12	0	0.5	2	6	4	35.12	107.22	0.39	-1.64	-1.41	-2.6	-1.15	-1.28	0.23	301	1.71	Highly soluble	-0.1	140	0.793	Very soluble	1.49	5460	31	Soluble	High	No	No	No	No	No	No	No	-8.54	0	2	0	0	1	0.56	0	0	1
Vitamin D2 or ergocalciferol	Molecule 4	OC1CCC(=C)C(=CC=C2CCCC3(C2CCC3C(C=CC(C(C)C)C)C)C)C1	C28H44O	5280793	396.65	29	0	0.71	5	1	1	129.37	20.23	5	7.42	7.64	6.24	7.51	6.76	-6.64	9.01e-05	2.27e-07	Poorly soluble	-7.68	8.37e-06	2.11e-08	Poorly soluble	-5.31	0.00195	4.91e-06	Moderately soluble	Low	No	No	No	No	Yes	No	No	-3.45	1	2	0	1	2	0.55	0	1	2
Ganoderic acid DM	Molecule 5	CC(C1CCC2(C1(C)CCC1=C2C(=O)CC2C1(C)CCC(=O)C2(C)C)C)CCC=C(C(=O)O)C	C30H44O4	11784642	468.67	34	0	0.77	5	4	1	138.05	71.44	3.89	6.37	6.93	4.7	7.03	5.78	-6.43	0.000175	3.73e-07	Poorly soluble	-7.66	1.02e-05	2.18e-08	Poorly soluble	-6.72	8.83e-05	1.88e-07	Poorly soluble	Low	No	Yes	No	No	Yes	No	No	-4.64	1	3	0	1	1	0.85	0	1	2
ERGOSTEROL	Molecule 6	OC1CCC2(C(=CC=C3C2CCC2(C3CCC2C(C=CC(C(C)C)C)C)C)C1)C	C28H44O	444679	396.65	29	0	0.79	4	1	1	127.47	20.23	4.92	7.43	7.33	6.33	6.44	6.49	-6.72	7.63e-05	1.92e-07	Poorly soluble	-7.69	8.17e-06	2.06e-08	Poorly soluble	-5.06	0.00345	8.69e-06	Moderately soluble	Low	No	No	No	No	Yes	No	No	-3.44	1	2	0	1	2	0.55	0	1	2
Mannitol	Molecule 7	OCC(C(C(C(CO)O)O)O)O	C6H14O6	6251	182.17	12	0	1	5	6	6	37.93	121.38	0.34	-3.1	-3.59	-2.77	-1.91	-2.21	1.31	3750	20.6	Highly soluble	1.12	2380	13.1	Highly soluble	2.57	67100	368	Soluble	Low	No	No	No	No	No	No	No	-9.61	1	2	0	0	3	0.55	0	0	1
Isohericenone J	Molecule 8	COc1cc2C(=O)OCc2c(c1CC=C(CCC=C(C)C)C)O	C19H24O4	101879805	316.39	23	6	0.42	6	4	1	91.56	55.76	3.8	4.75	4.15	3.12	4.89	4.14	-4.59	0.00811	2.56e-05	Moderately soluble	-5.65	0.000706	2.23e-06	Moderately soluble	-4.67	0.00681	2.15e-05	Moderately soluble	High	Yes	No	Yes	No	Yes	No	No	-4.86	0	0	0	0	0	0.55	0	1	1
Eritadenine	Molecule 9	OC(C(C(=O)O)O)Cn1cnc2c1ncnc2N	C9H11N5O4	159961	253.21	18	9	0.33	4	7	4	59.51	147.38	0.44	-1.83	-1.78	-2.3	-1.92	-1.48	-0.36	110	0.433	Very soluble	-0.75	45.3	0.179	Very soluble	0.29	490	1.94	Soluble	Low	No	No	No	No	No	No	No	-9.14	0	1	1	1	0	0.56	0	0	0
Fumaric acid	Molecule 10	OC(=O)/C=C/C(=O)O	C4H4O4	444972	116.07	8	0	0	2	4	2	24.41	74.6	0.32	-0.34	-0.29	-0.64	-0.81	-0.35	-0.21	71	0.612	Very soluble	-0.76	19.9	0.172	Very soluble	1.34	2520	21.7	Soluble	High	No	No	No	No	No	No	No	-7.25	0	3	0	0	2	0.85	0	1	1
Glutamic acid	Molecule 11	OC(=O)CCC(C(=O)O)N	C5H9NO4	33032	147.13	10	0	0.6	4	5	3	32.4	100.62	0.41	-3.69	-0.74	-3.18	-1.19	-1.68	1.84	10100	68.6	Highly soluble	2.16	21500	146	Highly soluble	0.89	1150	7.83	Soluble	High	No	No	No	No	No	No	No	-9.82	0	4	0	0	2	0.56	0	0	1
sorbitol	Molecule 12	OCC(C(C(C(CO)O)O)O)O	C6H14O6	5780	182.17	12	0	1	5	6	6	37.93	121.38	0.34	-3.1	-3.59	-2.77	-1.91	-2.21	1.31	3750	20.6	Highly soluble	1.12	2380	13.1	Highly soluble	2.57	67100	368	Soluble	Low	No	No	No	No	No	No	No	-9.61	1	2	0	0	3	0.55	0	0	1
Grifolin	Molecule 13	CC(=CCc1c(O)cc(cc1O)C)CCC=C(CCC=C(C)C)C	C22H32O2	5372312	328.49	24	6	0.45	8	2	2	106.3	40.46	4.39	7.22	6.37	4.84	6.29	5.82	-6.08	0.000272	8.28e-07	Poorly soluble	-7.89	4.2e-06	1.28e-08	Poorly soluble	-5.45	0.00116	3.54e-06	Moderately soluble	High	No	No	Yes	No	Yes	No	Yes	-3.18	1	1	0	1	1	0.55	0	1	2
Clitocine	Molecule 14	OCC1OC(C(C1O)O)Nc1ncnc(c1[N+](=O)[O-])N	C9H13N5O6	129111	287.23	20	6	0.56	4	8	5	66.25	179.57	0.59	-0.41	-2.36	-3.18	-4.23	-1.92	-1.32	13.7	0.0478	Very soluble	-2.9	0.364	0.00127	Soluble	0.67	1350	4.7	Soluble	Low	No	No	No	No	No	No	No	-8.34	1	1	1	1	1	0.55	0	2	0
Hisplone	Molecule 15	CC(=O)C=C(C=Cc1ccc(c(c1)O)O)O	C12H12O4	10082188	220.22	16	6	0.08	3	4	3	61.1	77.76	1.92	2.04	2.03	0.68	1.54	1.64	-2.57	0.593	0.00269	Soluble	-3.3	0.11	0.0005	Soluble	-1.2	14	0.0637	Soluble	High	No	No	No	No	No	No	No	-6.19	0	0	0	0	0	0.56	1	4	1
Psilocybin	Molecule 16	CN(CCc1c[nH]c2c1c(ccc2)OP(=O)(O)O)C	C12H17N2O4P	10624	284.25	19	9	0.33	5	5	3	73.25	95.6	0.83	-1.59	1.74	0.27	1.08	0.47	-0.62	68	0.239	Very soluble	0.09	351	1.23	Highly soluble	-2.81	0.442	0.00156	Soluble	High	No	No	No	No	No	No	No	-9.16	0	0	0	0	0	0.56	0	1	0
ERGOTHIONEINE	Molecule 17	[O-]C(=O)C([N+](C)(C)C)Cc1c[nH]c(=S)[nH]1	C9H15N3O2S	5351619	229.3	15	5	0.56	4	2	2	57.18	103.8	-1.99	-0.3	-0.56	-4.29	1.88	-1.05	-1.06	20.2	0.088	Very soluble	-1.42	8.72	0.038	Very soluble	-2.4	0.917	0.004	Soluble	High	No	No	No	No	No	No	No	-7.91	0	1	0	0	0	0.55	0	2	1
beta-carotene	Molecule 18	CC(=CC=CC=C(C=CC=C(C=CC1=C(C)CCCC1(C)C)C)C)C=CC=C(C=CC1=C(C)CCCC1(C)C)C	C40H56	5280489	536.87	40	0	0.45	10	0	0	184.43	0	7.79	13.54	12.61	8.96	12.65	11.11	-11.04	4.91e-09	9.15e-12	Insoluble	-13.6	1.34e-11	2.5e-14	Insoluble	-7.59	1.38e-05	2.56e-08	Poorly soluble	Low	No	Yes	No	No	No	No	No	0.04	2	4	0	1	2	0.17	0	1	3
lycopene	Molecule 19	CC(=CC=CC=C(C=CC=C(C=CC=C(CCC=C(C)C)C)C)C)C=CC=C(C=CC=C(CCC=C(C)C)C)C	C40H56	446925	536.87	40	0	0.35	16	0	0	188.23	0	8.53	15.56	12.94	9.21	13.28	11.9	-11.92	6.52e-10	1.22e-12	Insoluble	-15.7	1.08e-13	2.01e-16	Insoluble	-6.32	0.000258	4.81e-07	Poorly soluble	Low	No	Yes	No	No	No	No	No	1.47	2	4	1	1	3	0.17	0	2	3
Epigallocatechin gallate	Molecule 20	Oc1cc(O)c2c(c1)OC(C(C2)OC(=O)c1cc(O)c(c(c1)O)O)c1cc(O)c(c(c1)O)O	C22H18O11	65064	458.37	33	18	0.14	4	11	8	112.06	197.37	1.87	1.17	1.91	-0.44	0.57	1.01	-3.56	0.127	0.000276	Soluble	-4.91	0.00564	1.23e-05	Moderately soluble	-2.5	1.46	0.00318	Soluble	Low	No	No	No	No	No	No	No	-8.27	2	0	1	1	3	0.17	1	1	1
p-coumaric acid	Molecule 21	OC(=O)C=Cc1ccc(cc1)O	C9H8O3	637542	164.16	12	6	0	2	3	2	45.13	57.53	0.95	1.46	1.38	1.28	1.22	1.26	-2.02	1.58	0.00965	Soluble	-2.27	0.873	0.00532	Soluble	-1.28	8.67	0.0528	Soluble	High	Yes	No	No	No	No	No	No	-6.26	0	0	0	0	1	0.85	0	1	1
protocatechuic acid	Molecule 22	OC(=O)c1ccc(c(c1)O)O	C7H6O4	72	154.12	11	6	0	1	4	3	37.45	77.76	0.66	1.15	0.8	0.4	0.26	0.65	-1.86	2.14	0.0139	Very soluble	-2.38	0.646	0.00419	Soluble	-0.6	38.3	0.248	Soluble	High	No	No	No	No	No	No	Yes	-6.42	0	3	0	0	1	0.56	1	1	1
Gentisic acid	Molecule 23	Oc1ccc(c(c1)C(=O)O)O	C7H6O4	3469	154.12	11	6	0	1	4	3	37.45	77.76	0.49	1.74	0.8	0.4	0.26	0.74	-2.23	0.909	0.0059	Soluble	-2.99	0.158	0.00102	Soluble	-0.6	38.3	0.248	Soluble	High	No	No	No	No	No	No	Yes	-6	0	3	0	0	1	0.56	0	1	1
caffeic acid	Molecule 24	OC(=O)C=Cc1ccc(c(c1)O)O	C9H8O4	689043	180.16	13	6	0	2	4	3	47.16	77.76	0.97	1.15	1.09	0.7	0.75	0.93	-1.89	2.32	0.0129	Very soluble	-2.38	0.755	0.00419	Soluble	-0.71	35.1	0.195	Soluble	High	No	No	No	No	No	No	No	-6.58	0	0	0	0	1	0.56	1	2	1
Vanillic acid	Molecule 25	COc1cc(ccc1O)C(=O)O	C8H8O4	8468	168.15	12	6	0.12	2	4	2	41.92	66.76	1.4	1.43	1.1	0.74	0.73	1.08	-2.02	1.6	0.00952	Soluble	-2.44	0.615	0.00366	Soluble	-1.32	8.1	0.0482	Soluble	High	No	No	No	No	No	No	No	-6.31	0	0	0	0	1	0.85	0	0	1
Ferulic acid	Molecule 26	COc1cc(C=CC(=O)O)ccc1O	C10H10O4	445858	194.18	14	6	0.1	3	4	2	51.63	66.76	1.62	1.51	1.39	1	1.26	1.36	-2.11	1.49	0.00768	Soluble	-2.52	0.586	0.00302	Soluble	-1.42	7.43	0.0383	Soluble	High	Yes	No	No	No	No	No	No	-6.41	0	0	0	0	1	0.85	0	1	1
SYRINGIC ACID	Molecule 27	COc1cc(cc(c1O)OC)C(=O)O	C9H10O5	10742	198.17	14	6	0.22	3	5	2	48.41	75.99	1.54	1.04	1.11	0.49	0.77	0.99	-1.84	2.84	0.0144	Very soluble	-2.23	1.18	0.00594	Soluble	-1.46	6.93	0.035	Soluble	High	No	No	No	No	No	No	No	-6.77	0	0	0	0	1	0.56	0	0	1
Veratric acid	Molecule 28	COc1cc(ccc1OC)C(=O)O	C9H10O4	7121	182.17	13	6	0.22	3	4	1	46.39	55.76	1.65	1.61	1.4	1.06	1.23	1.39	-2.13	1.36	0.00746	Soluble	-2.39	0.737	0.00405	Soluble	-2.03	1.72	0.00942	Soluble	High	Yes	No	No	No	No	No	No	-6.27	0	0	0	0	1	0.85	0	0	1
salicylic acid	Molecule 29	OC(=O)c1ccccc1O	C7H6O3	338	138.12	10	6	0	1	3	2	35.42	57.53	1.13	2.26	1.09	0.99	0.74	1.24	-2.5	0.439	0.00318	Soluble	-3.1	0.109	0.000786	Soluble	-1.17	9.4	0.0681	Soluble	High	Yes	No	No	No	No	No	No	-5.54	0	3	0	0	1	0.85	0	0	1
rosmarinic acid	Molecule 30	O=C(OC(C(=O)O)Cc1ccc(c(c1)O)O)C=Cc1ccc(c(c1)O)O	C18H16O8	5281792	360.31	26	12	0.11	7	8	5	91.4	144.52	1.17	2.36	1.65	0.9	1.5	1.52	-3.44	0.131	0.000363	Soluble	-5.04	0.00332	9.22e-06	Moderately soluble	-2.17	2.41	0.0067	Soluble	Low	No	No	No	No	No	No	No	-6.82	0	0	1	1	0	0.56	1	2	1
Gallic acid	Molecule 31	OC(=O)c1cc(O)c(c(c1)O)O	C7H6O5	370	170.12	12	6	0	1	5	4	39.47	97.99	0.21	0.7	0.5	-0.16	-0.2	0.21	-1.64	3.9	0.0229	Very soluble	-2.34	0.786	0.00462	Soluble	-0.04	155	0.91	Soluble	High	No	No	No	No	No	No	Yes	-6.84	0	2	0	0	1	0.56	1	1	1
acetic acid	Molecule 32	CC(=O)O	C2H4O2	176	60.05	4	0	0.5	0	2	1	13.5	37.3	0.63	-0.21	0.09	-0.49	-0.48	-0.09	-0.08	49.9	0.832	Very soluble	-0.12	45.9	0.765	Very soluble	0.53	205	3.42	Soluble	High	No	No	No	No	No	No	No	-6.82	0	3	0	0	2	0.85	0	0	1
myricetin	Molecule 33	Oc1cc(O)c2c(c1)oc(c(c2=O)O)c1cc(O)c(c(c1)O)O	C15H10O8	5281672	318.24	23	16	0	1	8	6	80.06	151.59	1.08	1.18	1.69	-1.08	1.06	0.79	-3.01	0.314	0.000988	Soluble	-3.96	0.035	0.00011	Soluble	-2.66	0.698	0.00219	Soluble	Low	No	No	Yes	No	No	No	Yes	-7.4	1	0	1	1	2	0.55	1	1	0
eriodictyol	Molecule 34	Oc1cc2OC(CC(=O)c2c(c1)O)c1ccc(c(c1)O)O	C15H12O6	440735	288.25	21	12	0.13	1	6	4	73.59	107.22	1.62	2.02	1.89	0.16	1.56	1.45	-3.26	0.16	0.000554	Soluble	-3.9	0.0364	0.000126	Soluble	-2.84	0.419	0.00145	Soluble	High	No	Yes	No	No	No	No	Yes	-6.62	0	0	0	0	0	0.55	1	1	0
Cordycepin	Molecule 35	OCC1CC(C(O1)n1cnc2c1ncnc2N)O	C10H13N5O3	6303	251.24	18	9	0.5	2	6	3	61.51	119.31	1.3	-0.61	-1.27	-1.94	-1.48	-0.8	-1.25	14.1	0.0561	Very soluble	-1.42	9.47	0.0377	Very soluble	-0.4	100	0.398	Soluble	High	No	No	No	No	No	No	No	-8.27	0	1	0	0	0	0.55	0	0	0
Caffeic acid phenethyl ester	Molecule 36	O=C(C=Cc1ccc(c(c1)O)O)OCCc1ccccc1	C17H16O4	5281787	284.31	21	12	0.12	6	4	2	80.77	66.76	2.66	4.15	2.79	2.62	3.26	3.09	-4.24	0.0162	5.7e-05	Moderately soluble	-5.26	0.00156	5.5e-06	Moderately soluble	-4.35	0.0127	4.48e-05	Moderately soluble	High	Yes	No	Yes	No	Yes	No	No	-5.09	0	0	0	0	0	0.55	1	2	1
4-acetylantroquinonol B	Molecule 37	COC1=C(OC)C(=O)C(C(C1OC(=O)C)CC=C(CCC=C(CC1OC(=O)C(C1)C)C)C)C	C26H38O7	53233421	462.58	33	0	0.65	11	7	0	126.39	88.13	4.34	5.01	4.66	2.2	4.97	4.24	-5.14	0.00336	7.27e-06	Moderately soluble	-6.6	0.000116	2.51e-07	Poorly soluble	-4.53	0.0135	2.92e-05	Moderately soluble	High	No	No	No	No	Yes	Yes	Yes	-5.56	0	1	1	0	1	0.56	0	2	3
Clitocine	Molecule 38	OCC1OC(C(C1O)O)Nc1ncnc(c1[N+](=O)[O-])N	C9H13N5O6	129111	287.23	20	6	0.56	4	8	5	66.25	179.57	0.59	-0.41	-2.36	-3.18	-4.23	-1.92	-1.32	13.7	0.0478	Very soluble	-2.9	0.364	0.00127	Soluble	0.67	1350	4.7	Soluble	Low	No	No	No	No	No	No	No	-8.34	1	1	1	1	1	0.55	0	2	0
Ganoderic acid S1	Molecule 39	CC(C1CCC2(C1(C)CC=C1C2=CCC2C1(C)CCC(=O)C2(C)C)C)CCC=C(C(=O)O)C	C30H44O3	146156325	452.67	33	0	0.73	5	3	1	137.38	54.37	3.62	7	7.53	5.55	6.92	6.12	-6.73	8.5e-05	1.88e-07	Poorly soluble	-7.96	5e-06	1.1e-08	Poorly soluble	-6.38	0.000187	4.13e-07	Poorly soluble	Low	No	Yes	No	No	Yes	No	No	-4.09	1	3	0	1	1	0.85	0	1	2
Ganodermic acid TQ	Molecule 40	CC(=O)OC1CC(C2(C1(C)C1=CCC3C(C1=CC2)(C)CCC(=O)C3(C)C)C)C(CCC=C(C(=O)O)C)C	C32H46O5	14137643	510.7	37	0	0.72	7	5	1	148.28	80.67	4.13	6.23	7.07	4.98	6.58	5.8	-6.47	0.000173	3.39e-07	Poorly soluble	-7.71	9.95e-06	1.95e-08	Poorly soluble	-6.17	0.000348	6.81e-07	Poorly soluble	Low	No	Yes	No	No	Yes	No	No	-4.99	2	4	0	1	1	0.56	0	1	2
Ganodermanontriol	Molecule 41	OCC(C(CCC(C1CCC2(C1(C)CC=C1C2=CCC2C1(C)CCC(=O)C2(C)C)C)C)O)(O)C	C30H48O4	3001811	472.7	34	0	0.83	6	4	3	139.6	77.76	4.04	4.78	5.6	4.06	6	4.9	-5.39	0.00194	4.11e-06	Moderately soluble	-6.14	0.000339	7.17e-07	Poorly soluble	-5.68	0.000994	2.1e-06	Moderately soluble	High	No	No	No	No	No	No	Yes	-5.79	0	3	0	0	0	0.55	0	0	2
Ganolucidic acid A	Molecule 42	O=C(CC(C(=O)O)C)CC(C1CC(C2(C1(C)CC(=O)C1=C2CCC2C1(C)CCC(=O)C2(C)C)C)O)C	C30H44O6	475412	500.67	36	0	0.8	6	6	2	139.89	108.74	3.01	3.48	5.16	3.06	5.87	4.11	-4.74	0.0091	1.82e-05	Moderately soluble	-5.45	0.00179	3.58e-06	Moderately soluble	-5.79	0.000808	1.61e-06	Moderately soluble	High	No	Yes	No	No	No	No	Yes	-6.88	1	3	0	0	0	0.56	0	0	1
7-Oxo-ganoderic acid Z	Molecule 43	CC(C1CCC2(C1(C)CCC1=C2C(=O)CC2C1(C)CCC(C2(C)C)O)C)CCC=C(C(=O)O)C	C30H46O4	71461154	470.68	34	0	0.8	5	4	2	139.01	74.6	4.08	6.68	6.72	4.78	6.44	5.74	-6.64	0.000109	2.31e-07	Poorly soluble	-8.05	4.2e-06	8.92e-09	Poorly soluble	-6.03	0.000441	9.38e-07	Poorly soluble	Low	No	Yes	No	No	Yes	No	Yes	-4.43	1	3	0	1	1	0.85	0	1	2
Lucidenic acid D	Molecule 44	CC(=O)OC1C(=O)C2=C(C3(C1(C)C(CC3=O)C(CCC(=O)O)C)C)C(=O)CC1C2(C)CCC(=O)C1(C)C	C29H38O8	23247891	514.61	37	0	0.72	6	8	1	135.4	131.88	2.72	2.48	3.88	1.93	5.19	3.24	-4.2	0.0327	6.35e-05	Moderately soluble	-4.89	0.00657	1.28e-05	Moderately soluble	-5.82	0.000779	1.51e-06	Moderately soluble	Low	No	Yes	No	No	No	No	No	-7.68	1	3	0	1	0	0.56	0	0	1
Lucidenic acid E	Molecule 45	CC(=O)OC1C(=O)C2=C(C3(C1(C)C(CC3=O)C(CCC(=O)O)C)C)C(=O)CC1C2(C)CCC(C1(C)C)O	C29H40O8	23247892	516.62	37	0	0.76	6	8	2	136.37	135.04	2.78	2.8	3.68	2	4.6	3.17	-4.41	0.02	3.88e-05	Moderately soluble	-5.29	0.00263	5.1e-06	Moderately soluble	-5.12	0.00388	7.52e-06	Moderately soluble	Low	No	Yes	No	No	No	No	Yes	-7.46	1	3	0	1	0	0.56	0	0	1
Lucidenic acid A	Molecule 46	OC(=O)CCC(C1CC(=O)C2(C1(C)CC(=O)C1=C2C(O)CC2C1(C)CCC(=O)C2(C)C)C)C	C27H38O6	14109375	458.59	33	0	0.78	4	6	2	125.47	108.74	2.76	2.09	4.13	2.47	4.95	3.28	-3.74	0.0842	0.000184	Soluble	-4	0.0455	9.92e-05	Moderately soluble	-5.34	0.00209	4.55e-06	Moderately soluble	High	No	Yes	No	No	No	No	Yes	-7.61	0	1	0	0	0	0.56	0	0	1
Lucidenic acid B	Molecule 47	OC(=O)CCC(C1CC(=O)C2(C1(C)C(O)C(=O)C1=C2C(O)CC2C1(C)CCC(=O)C2(C)C)C)C	C27H38O7	102410351	474.59	34	0	0.78	4	7	3	126.63	128.97	2.13	1.53	3.11	1.67	4.06	2.5	-3.48	0.156	0.000329	Soluble	-3.85	0.0675	0.000142	Soluble	-4.52	0.0143	3.02e-05	Moderately soluble	High	No	Yes	No	No	No	No	Yes	-8.11	0	1	0	0	0	0.56	0	0	1
Ganoderic Acid T	Molecule 48	CC(=O)OC1CC(C2(C1(C)C1=CCC3C(C1=CC2)(C)CCC(C3(C)C)OC(=O)C)C)C(C(OC(=O)C)CC=C(C(=O)O)C)C	C36H52O8	21637704	612.79	44	0	0.72	11	8	1	169.87	116.2	3.82	6.53	6.97	4.85	6.33	5.7	-7.03	5.76e-05	9.39e-08	Poorly soluble	-8.77	1.05e-06	1.71e-09	Poorly soluble	-5.72	0.00118	1.92e-06	Moderately soluble	Low	No	Yes	No	No	Yes	No	No	-5.4	2	4	1	1	2	0.56	0	2	3
1-oleoyl-2-linoleoyl-3-palmitoylglycerol	Molecule 49	CCCCCCCCCCCCCCCC(=O)OCC(OC(=O)CCCCCCCC=CCC=CCCCCC)COC(=O)CCCCCCCC=CCCCCCCCC	C55H100O6	14299219	857.38	61	0	0.84	51	6	0	268.93	78.9	12.04	21.56	17.32	9.19	20.2	16.06	-15.37	3.64e-13	4.24e-16	Insoluble	-23.58	2.25e-21	2.62e-24	Insoluble	-16.73	1.59e-14	1.85e-17	Insoluble	Low	No	Yes	No	No	No	No	No	3.78	2	4	1	1	3	0.17	0	2	3
Panepoxydone	Molecule 50	CC(=CC(C1=CC(O)C2C(C1=O)O2)O)C	C11H14O4	11148494	210.23	15	0	0.55	2	4	2	53.42	70.06	1.83	0.63	-0.05	-0.27	0.97	0.62	-1.41	8.21	0.0391	Very soluble	-1.68	4.43	0.0211	Very soluble	0	211	1	Soluble	High	No	No	No	No	No	No	No	-7.14	0	0	0	0	0	0.55	0	2	1
Zhankuic acid A	Molecule 51	CC(C(=C)CCC(C1CCC2C1(C)CC(=O)C1=C2C(=O)CC2C1(C)CCC(=O)C2C)C)C(=O)O	C29H40O5	10004842	468.62	34	0	0.72	6	5	1	133.96	88.51	3.28	5.28	5.58	3.59	6.1	4.77	-5.68	0.000988	2.11e-06	Moderately soluble	-6.89	6.05e-05	1.29e-07	Poorly soluble	-5.81	0.000733	1.56e-06	Moderately soluble	High	No	Yes	No	No	Yes	No	No	-5.41	0	2	0	0	1	0.56	0	1	2
Thelephantin O	Molecule 52	Oc1ccc(cc1)c1c(OC(=O)Cc2ccccc2)c(OC(=O)c2ccccc2)c(c(c1O)O)c1ccc(cc1)O	C33H24O8	53375718	548.54	41	30	0.03	9	8	4	152.79	133.52	3.12	6.51	6.21	3.97	5.6	5.08	-7.29	2.82e-05	5.13e-08	Poorly soluble	-9.11	4.25e-07	7.75e-10	Poorly soluble	-9.71	1.06e-07	1.94e-10	Poorly soluble	Low	No	No	No	No	No	No	No	-5.02	1	3	0	2	1	0.55	1	2	3
Vialinin A	Molecule 53	O=C(Oc1c(c2ccc(cc2)O)c(O)c(c(c1OC(=O)Cc1ccccc1)c1ccc(cc1)O)O)Cc1ccccc1	C34H26O8	11563133	562.57	42	30	0.06	10	8	4	157.38	133.52	3.29	6.45	6.14	4.15	6.01	5.21	-7.26	3.09e-05	5.5e-08	Poorly soluble	-9.05	5.03e-07	8.95e-10	Poorly soluble	-10.1	4.47e-08	7.94e-11	Insoluble	Low	No	No	No	No	No	No	No	-5.15	2	3	0	2	1	0.17	1	2	3
fumaric acid	Molecule 54	OC(=O)C=CC(=O)O	C4H4O4	444972	116.07	8	0	0	2	4	2	24.41	74.6	0.32	-0.34	-0.29	-0.64	-0.81	-0.35	-0.21	71	0.612	Very soluble	-0.76	19.9	0.172	Very soluble	1.34	2520	21.7	Soluble	High	No	No	No	No	No	No	No	-7.25	0	3	0	0	2	0.85	0	1	1
succinic acid	Molecule 55	OC(=O)CCC(=O)O	C4H6O4	1110	118.09	8	0	0.5	3	4	2	24.89	74.6	0.32	-0.59	-0.06	-0.54	-0.63	-0.3	0	117	0.994	Very soluble	-0.51	36.9	0.312	Very soluble	0.61	486	4.11	Soluble	High	No	No	No	No	No	No	No	-7.44	0	3	0	0	2	0.85	0	0	1
malic acid	Molecule 56	OC(=O)CC(C(=O)O)O	C4H6O5	525	134.09	9	0	0.5	3	5	3	26.05	94.83	-0.01	-1.26	-1.09	-1.37	-1.25	-1	0.32	280	2.09	Highly soluble	-0.24	78	0.582	Very soluble	1.53	4510	33.7	Soluble	High	No	No	No	No	No	No	No	-8.01	0	4	0	0	2	0.56	0	0	1
Tartaric acid	Molecule 57	OC(C(C(=O)O)O)C(=O)O	C4H6O6	875	150.09	10	0	0.5	3	6	4	27.21	115.06	-0.83	-1.88	-2.12	-2.18	-1.88	-1.78	0.61	614	4.09	Highly soluble	-0.02	144	0.963	Very soluble	2.44	41700	278	Soluble	Low	No	No	No	No	No	No	No	-8.55	0	4	0	0	2	0.56	0	0	1
citric acid	Molecule 58	OC(=O)C(CC(=O)O)(CC(=O)O)O	C6H8O7	311	192.12	13	0	0.5	5	7	4	37.47	132.13	-1.49	-1.72	-1.25	-1.48	-1.6	-1.51	0.38	463	2.41	Highly soluble	-0.54	55.3	0.288	Very soluble	1.71	9900	51.5	Soluble	Low	No	No	No	No	No	No	No	-8.69	0	2	0	1	1	0.56	0	0	1
Boletopsin C	Molecule 59	CC(=O)Oc1c(c2ccc(c(c2)O)O)c(O)c(c2c1oc1c2cc(c(c1)O)O)O	C20H14O9	46831715	398.32	29	19	0.05	3	9	6	102.79	160.82	1.26	2.91	3.41	0.54	2	2.02	-4.43	0.0148	3.72e-05	Moderately soluble	-5.95	0.000449	1.13e-06	Moderately soluble	-4.03	0.0372	9.33e-05	Moderately soluble	Low	No	No	Yes	No	No	No	No	-6.66	1	0	1	1	2	0.55	1	2	1
Thelephantin O	Molecule 60	Oc1ccc(cc1)c1c(OC(=O)Cc2ccccc2)c(OC(=O)c2ccccc2)c(c(c1O)O)c1ccc(cc1)O	C33H24O8	53375718	548.54	41	30	0.03	9	8	4	152.79	133.52	3.12	6.51	6.21	3.97	5.6	5.08	-7.29	2.82e-05	5.13e-08	Poorly soluble	-9.11	4.25e-07	7.75e-10	Poorly soluble	-9.71	1.06e-07	1.94e-10	Poorly soluble	Low	No	No	No	No	No	No	No	-5.02	1	3	0	2	1	0.55	1	2	3
Methyl isoxerocomate	Molecule 61	COC(=O)C(=C1OC(=O)C(=C1O)c1ccc(cc1)O)c1ccc(c(c1)O)O	C19H14O8	102235613	370.31	27	12	0.05	4	8	4	93.47	133.52	1.97	1.92	2.21	0.4	1.77	1.65	-3.41	0.144	0.000389	Soluble	-4.35	0.0166	4.49e-05	Moderately soluble	-3.38	0.156	0.000421	Soluble	High	No	No	No	No	No	No	No	-7.2	0	0	0	1	0	0.56	1	3	1
4-Hydroxyphenylpyruvic acid	Molecule 62	Oc1ccc(cc1)CC(=O)C(=O)O	C9H8O4	979	180.16	13	6	0.11	3	4	2	45.02	74.6	0.7	0.91	0.59	0.43	0.95	0.72	-1.67	3.82	0.0212	Very soluble	-2.06	1.56	0.00867	Soluble	-1.55	5.1	0.0283	Soluble	High	No	No	No	No	No	No	No	-6.75	0	0	0	0	1	0.85	0	1	1
Variegatic acid	Molecule 63	O=C1OC(=C(c2ccc(c(c2)O)O)C(=O)O)C(=C1c1ccc(c(c1)O)O)O	C18H12O9	101967051	372.28	27	12	0	3	9	6	91.17	164.75	0.92	1.24	1.83	-0.34	0.76	0.88	-3.06	0.324	0.00087	Soluble	-4.3	0.0188	5.04e-05	Moderately soluble	-2.1	2.98	0.008	Soluble	Low	No	Yes	No	No	No	No	No	-7.69	1	0	1	1	2	0.11	1	2	1
Norbadione A	Molecule 64	Oc1ccc(cc1)C(=C1OC(=O)C(=C1O)c1cc2C(=O)Oc3c2c(c1)c(cc3O)C1=C(O)C(=C(c2ccc(cc2)O)C(=O)O)OC1=O)C(=O)O	C35H18O15	54679293	678.51	50	22	0	6	15	7	168.25	254.65	1.54	3.07	4.13	0.59	3.04	2.47	-5.91	0.000834	1.23e-06	Moderately soluble	-8.08	5.58e-06	8.23e-09	Poorly soluble	-5.95	0.000767	1.13e-06	Moderately soluble	Low	No	No	No	No	No	No	No	-8.26	3	2	1	1	4	0.11	0	3	1
Xerocomic acid	Molecule 65	Oc1ccc(cc1)C(=C1OC(=O)C(=C1O)c1ccc(c(c1)O)O)C(=O)O	C18H12O8	54730624	356.28	26	12	0	3	8	5	89.15	144.52	1.11	1.6	2.13	0.17	1.23	1.25	-3.2	0.225	0.00063	Soluble	-4.25	0.0202	5.67e-05	Moderately soluble	-2.68	0.738	0.00207	Soluble	Low	No	No	No	No	No	No	No	-7.34	0	0	1	1	0	0.56	1	2	1
Tricholomalide A	Molecule 66	O=C1OC2C(C1)(C)C1(O)C(=C)COC1C1C(C2)(C)C(CC1=O)C(C)C	C20H28O5	11348615	348.43	25	0	0.8	1	5	1	92.57	72.83	2.22	1.33	2.27	1.98	3.22	2.2	-2.77	0.589	0.00169	Soluble	-2.46	1.21	0.00346	Soluble	-3.43	0.129	0.000371	Soluble	High	Yes	Yes	No	No	No	No	No	-7.48	0	0	0	0	0	0.55	0	1	0
Tricholomalide B	Molecule 67	OCC(=C)C1(O)C=C2C(=O)CC(C2(CC2C1(C)CC(=O)O2)C)C(C)C	C20H28O5	11473506	348.43	25	0	0.7	3	5	2	94.29	83.83	2.54	2.63	2.17	1.89	3.25	2.5	-3.46	0.121	0.000347	Soluble	-4.04	0.0317	9.1e-05	Moderately soluble	-3.24	0.2	0.000573	Soluble	High	No	Yes	No	No	No	No	No	-6.56	0	0	0	0	0	0.55	0	1	0
Tricholomalide C	Molecule 68	OCC(=C)C12OC(=O)CC2(C)C(O)CC2(C(=C1)C(=O)CC2C(C)C)C	C20H28O5	9997897	348.43	25	0	0.7	3	5	2	94.29	83.83	2.67	2.07	2.17	1.89	3.25	2.41	-3.11	0.273	0.000783	Soluble	-3.46	0.121	0.000347	Soluble	-3.24	0.2	0.000573	Soluble	High	No	Yes	No	No	No	No	No	-6.96	0	0	0	0	0	0.55	0	1	0
Cochlearol A	Molecule 69	OC(=O)C12CCC3OC2(CO3)c2c(C(=O)C1)c(O)ccc2O	C15H14O7	101894326	306.27	22	6	0.47	1	7	3	71.71	113.29	1.47	0.39	1.01	-0.06	1.16	0.79	-2.12	2.32	0.00758	Soluble	-2.33	1.42	0.00462	Soluble	-1.94	3.56	0.0116	Soluble	High	No	Yes	No	No	No	No	No	-7.89	0	0	0	0	0	0.56	0	1	0
Ganocin A	Molecule 70	O=CC1=CC23C4(CC1)C(C(O2)(C)C)CCC4(C)Oc1c3cc(O)cc1	C21H24O4	102340487	340.41	25	6	0.57	1	4	1	94.47	55.76	2.72	2.72	3.75	2.58	4.09	3.17	-3.78	0.057	0.000168	Soluble	-3.54	0.0971	0.000285	Soluble	-4.9	0.00433	1.27e-05	Moderately soluble	High	Yes	Yes	No	No	No	Yes	Yes	-6.45	0	0	0	0	0	0.55	0	1	0
Ganocin B	Molecule 71	O=C1CCC23C(=C1)c1cc(O)ccc1OC3(C)CCC2C(=C)C	C20H22O3	139585737	310.39	23	6	0.45	1	3	1	91.09	46.53	2.65	3.52	4.26	3.12	4.26	3.56	-4.11	0.0241	7.78e-05	Moderately soluble	-4.18	0.0205	6.59e-05	Moderately soluble	-4.92	0.00371	1.19e-05	Moderately soluble	High	Yes	Yes	Yes	Yes	Yes	No	Yes	-5.69	0	0	0	0	0	0.55	0	1	1
Ganocin D	Molecule 72	O=C1CC2=C3C(C1)c1cc(O)ccc1OC3(C)CCC=C(C2)C	C20H22O3	139585661	310.39	23	6	0.45	0	3	1	90.55	46.53	2.64	2.12	4.42	3.12	4.13	3.29	-3.29	0.158	0.000509	Soluble	-2.73	0.58	0.00187	Soluble	-5.02	0.00299	9.64e-06	Moderately soluble	High	Yes	Yes	Yes	Yes	No	No	Yes	-6.69	0	0	0	0	0	0.55	0	1	0
Ganodone	Molecule 73	CC(=O)c1ccc(cc1O)OC1Cc2c(O1)ccc(c2O)C(=O)C	C18H16O6	56598740	328.32	24	12	0.22	4	6	2	86.23	93.06	2.47	3.52	2.84	0.95	2.99	2.56	-4.2	0.0208	6.32e-05	Moderately soluble	-5.16	0.00228	6.95e-06	Moderately soluble	-4.21	0.0202	6.14e-05	Moderately soluble	High	No	No	Yes	No	Yes	No	Yes	-5.8	0	0	0	0	0	0.55	0	0	1
4-methoxy-6-phenylpyran-2-one	Molecule 74	COc1cc(=O)oc(c1)c1ccccc1	C12H10O3	249888	202.21	15	12	0.08	2	3	0	56.91	39.44	2.41	2.11	2.32	1.61	2.99	2.29	-2.88	0.265	0.00131	Soluble	-2.57	0.546	0.0027	Soluble	-4.58	0.00526	2.6e-05	Moderately soluble	High	Yes	No	Yes	No	No	No	No	-6.04	0	0	0	0	0	0.55	0	0	1
Hericenone A	Molecule 75	COc1cc2C(=O)OCc2c(c1CC=C(CC(=O)C=C(C)C)C)O	C19H22O5	11782478	330.37	24	6	0.37	6	5	1	91.76	72.83	3.06	3.59	3.33	2.22	4.45	3.33	-3.94	0.038	0.000115	Soluble	-4.81	0.00516	1.56e-05	Moderately soluble	-4.2	0.0207	6.25e-05	Moderately soluble	High	Yes	No	Yes	No	Yes	No	Yes	-5.77	0	0	0	0	0	0.55	0	2	1
Hericenone C	Molecule 76	CCCCCCCCCCCCCCCC(=O)OCc1cc(OC)c(c(c1C=O)O)CC=C(CC(=O)C=C(C)C)C	C35H54O6	15658905	570.8	41	6	0.63	24	6	1	170.99	89.9	6.21	11.2	9	4.67	10.93	8.4	-8.96	6.27e-07	1.1e-09	Poorly soluble	-13.06	4.96e-11	8.68e-14	Insoluble	-9.88	7.47e-08	1.31e-10	Poorly soluble	Low	No	No	No	No	No	No	No	-1.83	2	4	1	1	2	0.17	0	3	3
Hericenone J	Molecule 77	COc1cc2COC(=O)c2c(c1CC=C(CCC=C(C)C)C)O	C19H24O4	44588895	316.39	23	6	0.42	6	4	1	91.56	55.76	3.68	5.3	4.15	3.12	4.89	4.23	-4.94	0.00365	1.15e-05	Moderately soluble	-6.22	0.00019	6e-07	Poorly soluble	-4.67	0.00681	2.15e-05	Moderately soluble	High	Yes	No	Yes	No	Yes	No	No	-4.47	0	0	0	0	1	0.55	0	1	1
Hericenone D	Molecule 78	CCCCCCCCCCCCCCCCCC(=O)OCc1cc(OC)c(c(c1C=O)O)CC=C(CC(=O)C=C(C)C)C	C37H58O6	15658906	598.85	43	6	0.65	26	6	1	180.6	89.9	6.83	12.28	9.78	5.03	11.8	9.14	-9.68	1.26e-07	2.11e-10	Poorly soluble	-14.18	3.94e-12	6.58e-15	Insoluble	-10.65	1.33e-08	2.21e-11	Insoluble	Low	No	No	No	No	No	No	No	-1.23	2	4	1	1	2	0.17	0	3	3
Hericenone H	Molecule 79	CCCCCC=CCC=CCCCCCCCC(=O)OCc1cc(OC)c2c(c1C=O)OC(CC2)(C)CC(=O)C=C(C)C	C37H54O6	10416073	594.82	43	6	0.59	22	6	0	177.71	78.9	6.79	9.55	9.22	4.56	11.43	8.31	-8.2	3.79e-06	6.37e-09	Poorly soluble	-11.12	4.53e-09	7.62e-12	Insoluble	-9.86	8.19e-08	1.38e-10	Poorly soluble	Low	No	Yes	No	No	No	No	No	-3.15	2	4	1	1	2	0.17	0	3	3
Hericenone K	Molecule 80	COc1cc2COC(=O)c2c2c1CCC(O2)(C)CC(=O)CC(O)(C)C	C19H24O6	139588491	348.39	25	6	0.58	5	6	1	91.5	82.06	2.77	1.45	2.42	1.56	3.98	2.44	-2.76	0.604	0.00173	Soluble	-2.78	0.579	0.00166	Soluble	-4.62	0.00836	2.4e-05	Moderately soluble	High	No	Yes	No	No	No	No	No	-7.4	0	0	0	0	0	0.55	0	0	0
Hericenone E	Molecule 81	CCCCCC=CCC=CCCCCCCCC(=O)OCc1cc(OC)c(c(c1C=O)O)CC=C(CC(=O)C=C(C)C)C	C37H54O6	131752559	594.82	43	6	0.54	24	6	1	179.65	89.9	6.5	10.66	9.33	4.88	11.44	8.56	-8.76	1.03e-06	1.73e-09	Poorly soluble	-12.5	1.88e-10	3.16e-13	Insoluble	-9.22	3.58e-07	6.01e-10	Poorly soluble	Low	No	No	No	No	No	No	No	-2.36	2	4	1	1	2	0.17	0	3	3
Hericenone G	Molecule 82	CCCCCCCCCCCCCCCCCC(=O)OCc1cc(OC)c2c(c1C=O)OC(CC2)(C)CC(=O)C=C(C)C	C37H58O6	10348545	598.85	43	6	0.7	24	6	0	178.66	78.9	7.43	11.17	9.67	4.71	11.79	8.95	-9.11	4.66e-07	7.78e-10	Poorly soluble	-12.8	9.51e-11	1.59e-13	Insoluble	-11.29	3.04e-09	5.07e-12	Insoluble	Low	No	Yes	No	No	No	No	No	-2.02	2	4	1	1	2	0.17	0	2	3
AGARITINE	Molecule 83	OCc1ccc(cc1)NNC(=O)CCC(C(=O)O)N	C12H17N3O4	439517	267.28	19	6	0.33	8	5	5	68.58	124.68	1.14	-2.77	-0.53	-2.13	-0.42	-0.94	0.54	932	3.49	Highly soluble	0.7	1350	5.07	Highly soluble	-2.15	1.87	0.00701	Soluble	High	No	No	No	No	No	No	No	-9.9	0	1	0	0	1	0.55	0	0	1
Cordycepin	Molecule 84	OCC1CC(C(O1)n1cnc2c1ncnc2N)O	C10H13N5O3	6303	251.24	18	9	0.5	2	6	3	61.51	119.31	1.3	-0.61	-1.27	-1.94	-1.48	-0.8	-1.25	14.1	0.0561	Very soluble	-1.42	9.47	0.0377	Very soluble	-0.4	100	0.398	Soluble	High	No	No	No	No	No	No	No	-8.27	0	1	0	0	0	0.55	0	0	0
Erinacine A	Molecule 85	O=CC1=CC=C2C(C(C1)OC1OCC(C(C1O)O)O)(C)CCC1(C2=C(CC1)C(C)C)C	C25H36O6	9867477	432.55	31	0	0.72	4	6	3	117.75	96.22	3.05	1.96	2.82	1.74	2.84	2.48	-3.49	0.139	0.000322	Soluble	-3.61	0.107	0.000248	Soluble	-2.65	0.98	0.00226	Soluble	High	No	Yes	No	No	No	No	No	-7.55	0	0	0	0	0	0.55	0	1	1
Erinacine Q	Molecule 86	OCC1=CC(OC2OCC(C(C2O)O)O)C2(C(CC1OC(=O)C)C1=C(CCC1(CC2)C)C(C)C)C	C27H42O8	10206893	494.62	35	0	0.81	6	8	4	130.08	125.68	2.69	0.86	2.23	1.46	2.17	1.88	-3.05	0.438	0.000886	Soluble	-3.08	0.409	0.000826	Soluble	-2.33	2.33	0.00472	Soluble	High	No	Yes	No	No	No	No	No	-8.71	0	3	0	0	0	0.55	0	1	1
Erinacine P	Molecule 87	O=CC1=CC(OC2OCC(C(C2O)O)O)C2(C(CC1OC(=O)C)C1=C(CCC1(CC2)C)C(C)C)C	C27H40O8	15886639	492.6	35	0	0.78	6	8	3	129.12	122.52	3.18	1.38	2.44	1.37	2.48	2.17	-3.37	0.211	0.000429	Soluble	-3.56	0.137	0.000278	Soluble	-2.45	1.76	0.00357	Soluble	High	No	Yes	No	No	No	No	Yes	-8.33	0	2	0	0	0	0.55	0	2	1
Erinacine K	Molecule 88	CC(=O)OCC1=CC(OC2OCC(C(C2O)O)O)C2(C(CC1O)C1=C(CCC1(CC2)C)C(C)C)C	C27H42O8	16085268	494.62	35	0	0.81	6	8	4	130.08	125.68	3.88	0.86	2.23	1.46	2.17	2.12	-3.05	0.438	0.000886	Soluble	-3.08	0.409	0.000826	Soluble	-2.33	2.33	0.00472	Soluble	High	No	Yes	No	No	No	No	No	-8.71	0	3	0	0	0	0.55	0	1	1
Erinacine C	Molecule 89	OCC1=CCC2C(C3C1OC1C(O3)OCC(C1O)O)(C)CCC1(C2=C(CC1)C(C)C)C	C25H38O6	10252378	434.57	31	0	0.84	2	6	3	116.99	88.38	2.99	1.42	2.71	1.93	2.44	2.3	-3.3	0.219	0.000505	Soluble	-2.88	0.572	0.00132	Soluble	-2.62	1.04	0.0024	Soluble	High	No	Yes	No	No	No	No	No	-7.94	0	0	0	0	0	0.55	0	1	1
Erinacine D	Molecule 90	CCOC1CC2C3=C(CCC3(C)CCC2(C(C=C1C=O)OC1OCC(C(C1O)O)O)C)C(C)C	C27H42O7	9912965	478.62	34	0	0.81	6	7	3	128.92	105.45	3.51	1.71	2.91	1.44	2.92	2.5	-3.49	0.155	0.000325	Soluble	-3.54	0.138	0.000288	Soluble	-2.92	0.578	0.00121	Soluble	High	No	Yes	No	No	No	No	No	-8.01	0	1	0	0	0	0.55	0	2	1
lovastatin	Molecule 91	CCC(C(=O)OC1CC(C)C=C2C1C(CCC1CC(O)CC(=O)O1)C(C=C2)C)C	C24H36O5	53232	404.54	29	0	0.75	7	5	1	113.92	72.83	3.94	4.26	4.2	3.57	3.51	3.89	-4.57	0.0109	2.69e-05	Moderately soluble	-5.5	0.00128	3.15e-06	Moderately soluble	-3.19	0.263	0.00065	Soluble	High	Yes	No	No	No	Yes	No	Yes	-5.74	0	0	0	0	0	0.55	0	1	2
3-Hydroxyhericenone F	Molecule 92	CCCCCCCCCCCCCCCC(=O)OCc1cc(OC)c2c(c1C=O)OC(C(C2)O)(C)CC(=O)C=C(C)C	C35H54O7	44588861	586.8	42	6	0.69	22	7	1	170.21	99.13	6.05	9.11	7.86	3.56	10.05	7.33	-7.87	7.89e-06	1.35e-08	Poorly soluble	-11.09	4.81e-09	8.2e-12	Insoluble	-9.7	1.18e-07	2.01e-10	Poorly soluble	Low	No	Yes	No	No	No	No	Yes	-3.41	1	4	1	1	2	0.55	0	2	3
Grifolin	Molecule 93	CC(=CCc1c(O)cc(cc1O)C)CCC=C(CCC=C(C)C)C	C22H32O2	5372312	328.49	24	6	0.45	8	2	2	106.3	40.46	4.39	7.22	6.37	4.84	6.29	5.82	-6.08	0.000272	8.28e-07	Poorly soluble	-7.89	4.2e-06	1.28e-08	Poorly soluble	-5.45	0.00116	3.54e-06	Moderately soluble	High	No	No	Yes	No	Yes	No	Yes	-3.18	1	1	0	1	1	0.55	0	1	2
Antroquinonol	Molecule 94	COC1=C(OC)C(=O)C(C(C1O)CC=C(CCC=C(CCC=C(C)C)C)C)C	C24H38O4	24875259	390.56	28	0	0.62	10	4	1	117	55.76	4.04	5.8	5.5	2.69	5.53	4.71	-5.26	0.00217	5.55e-06	Moderately soluble	-6.74	7.09e-05	1.82e-07	Poorly soluble	-4.55	0.0109	2.79e-05	Moderately soluble	High	Yes	Yes	No	No	No	Yes	Yes	-4.56	0	0	0	0	1	0.85	0	1	3
Cristatomentin	Molecule 95	CC(=CCc1c(O)cc(c(c1O)C(=O)O)C)CCCc1cc(oc1C1=C(c2ccc(cc2)O)C(=O)C(=O)C(=C1O)c1ccc(cc1)O)C=C(C)C	C41H38O10	46184296	690.73	51	23	0.2	11	10	6	195.51	185.73	2.85	8.28	7.97	2.26	8.14	5.9	-8.95	7.81e-07	1.13e-09	Poorly soluble	-12.04	6.25e-10	9.04e-13	Insoluble	-9.96	7.5e-08	1.09e-10	Poorly soluble	Low	No	No	No	No	No	No	No	-4.63	2	4	2	2	4	0.11	2	3	3
MS-3	Molecule 96	OCc1c(CO)cc(c(c1O)CC=C(C)C)OC(=O)c1c(C)cc(cc1O)O	C21H24O7	100450	388.41	28	12	0.29	7	7	5	104.85	127.45	3.05	3.89	2.52	1.9	3.56	2.98	-4.55	0.0108	2.79e-05	Moderately soluble	-6.26	0.000211	5.44e-07	Poorly soluble	-4.13	0.029	7.46e-05	Moderately soluble	High	No	No	No	No	Yes	Yes	No	-5.91	0	0	0	0	0	0.55	0	2	2
Antrocamphin O	Molecule 97	COc1c(C#CC(=C)C)c(C)c(c2c1OCO2)OC	C15H16O4	56599300	260.29	19	6	0.33	2	4	0	72.34	36.92	3.45	3.84	2.75	2.11	3.81	3.19	-3.97	0.0276	0.000106	Soluble	-4.31	0.0127	4.88e-05	Moderately soluble	-3.71	0.0504	0.000194	Soluble	High	Yes	No	Yes	Yes	Yes	No	No	-5.16	0	0	0	0	0	0.55	0	1	1
Hericerin A	Molecule 98	OCCN1Cc2c(C1=O)cc(c(c2O)CC=C(CCC=C(C)C)C)OC	C21H29NO4	101879804	359.46	26	6	0.48	8	4	2	108.06	70	3.49	3.67	3.05	2.34	4.36	3.38	-4.02	0.0341	9.47e-05	Moderately soluble	-4.83	0.00532	1.48e-05	Moderately soluble	-4.47	0.0122	3.38e-05	Moderately soluble	High	Yes	No	No	No	No	Yes	No	-5.89	0	0	0	0	0	0.55	1	1	3
Sterenin M	Molecule 99	CC(CC(N1Cc2c(C1=O)cc(c(c2O)CC=C(C)C)OC(=O)c1c(C)cc(cc1O)O)C(=O)O)C	C27H31NO8	77461069	497.54	36	12	0.37	9	8	4	138.26	144.6	2.33	5.46	3.76	2.27	4.25	3.61	-6.02	0.000478	9.61e-07	Poorly soluble	-8.25	2.77e-06	5.58e-09	Poorly soluble	-4.79	0.00814	1.64e-05	Moderately soluble	Low	No	No	No	No	Yes	No	Yes	-5.46	0	2	1	1	1	0.56	1	2	3
Clitocybin A	Molecule 100	Oc1ccc(cc1)N1Cc2c(C1=O)cc(cc2O)O	C14H11NO4	25112175	257.24	19	12	0.07	1	4	3	72.61	81	1.31	1.45	1.43	1.13	1.34	1.33	-2.75	0.458	0.00178	Soluble	-2.76	0.45	0.00175	Soluble	-2.97	0.276	0.00107	Soluble	High	No	Yes	No	No	No	No	No	-6.84	0	0	0	0	0	0.55	1	0	0
Cordysinin A	Molecule 101	CC(CC1NC(=O)C2N(C1=O)C(O)CC2)C	C11H18N2O3	54671997	226.27	16	0	0.82	2	3	2	65.85	69.64	1.19	0.6	-0.92	0.22	0.12	0.24	-1.49	7.34	0.0324	Very soluble	-1.64	5.23	0.0231	Very soluble	-0.95	25.2	0.111	Soluble	High	No	No	No	No	No	No	No	-7.25	0	1	0	0	0	0.55	0	0	1
3,3-Dimethyl-3-ethoxy-L-alanine	Molecule 102	CCOC(C(C(=O)O)N)(C)C	C7H15NO3	46178011	161.2	11	0	0.86	4	4	2	41.37	72.55	1.3	-2.53	0.21	-2.32	-0.27	-0.72	1.02	1680	10.4	Highly soluble	1.55	5730	35.5	Highly soluble	-0.29	83.1	0.515	Soluble	High	No	No	No	No	No	No	No	-9.08	0	0	0	0	2	0.55	0	0	1
Emestrin	Molecule 103	COc1ccc2cc1Oc1cc(ccc1O)C(O)C13SSC4(N(C5C(OC2=O)C=COC=C5C4O)C3=O)C(=O)N1C	C27H22N2O10S2	11758256	598.6	41	12	0.3	1	10	3	151.77	205.9	2.68	-0.08	0.94	-0.76	-0.3	0.5	-3.65	0.134	0.000223	Soluble	-3.79	0.0966	0.000161	Soluble	-3.12	0.457	0.000764	Soluble	Low	No	Yes	No	No	No	No	No	-10.01	2	2	1	1	1	0.17	0	1	1
neoechinulin A	Molecule 104	C=CC(c1[nH]c2c(c1C=C1NC(=O)C(NC1=O)C)cccc2)(C)C	C19H21N3O2	9996305	323.39	24	9	0.26	3	2	3	102.94	73.99	2.57	3.33	1.74	1.53	3.87	2.61	-4.02	0.0307	9.5e-05	Moderately soluble	-4.56	0.0089	2.75e-05	Moderately soluble	-5.71	0.000635	1.96e-06	Moderately soluble	High	Yes	No	Yes	Yes	Yes	No	Yes	-5.91	0	0	0	0	0	0.55	0	2	0
Leccinine A	Molecule 105	CCOC(=O)CN(CCc1ccccc1)C=O	C13H17NO3	54590635	235.28	17	6	0.38	8	3	0	65.02	46.61	1.95	1.98	1.25	2.12	2.02	1.87	-2.28	1.24	0.00526	Soluble	-2.58	0.612	0.0026	Soluble	-3.38	0.097	0.000412	Soluble	High	Yes	No	No	Yes	No	No	No	-6.33	0	0	0	0	0	0.55	0	1	2
Antcin A	Molecule 106	CC(C(=C)CCC(C1CCC2C1(C)CC(=O)C1=C2CCC2C1(C)CCC(=O)C2C)C)C(=O)O	C29H42O4	44424392	454.64	33	0	0.76	6	4	1	133.76	71.44	3.48	6.2	6.4	4.51	6.4	5.4	-6.17	0.000308	6.78e-07	Poorly soluble	-7.49	1.49e-05	3.27e-08	Poorly soluble	-5.93	0.000533	1.17e-06	Moderately soluble	High	No	Yes	No	No	Yes	No	No	-4.67	1	3	0	1	1	0.85	0	1	2
Ethyl Lucidenate A	Molecule 107	CCOC(=O)CCC(C1CC(=O)C2(C1(C)CC(=O)C1=C2C(O)CC2C1(C)CCC(=O)C2(C)C)C)C	C29H42O6	71665526	486.64	35	0	0.79	6	6	1	134.59	97.74	3.67	2.78	4.61	2.86	5.92	3.97	-4.21	0.0298	6.13e-05	Moderately soluble	-4.49	0.0158	3.25e-05	Moderately soluble	-6.42	0.000185	3.81e-07	Poorly soluble	High	No	Yes	No	No	No	No	No	-7.29	0	3	0	0	0	0.55	0	0	1
Dehydroeburicoic acid	Molecule 108	CC(C(=C)CCC(C1CCC2(C1(C)CC=C1C2=CCC2C1(C)CCC(C2(C)C)O)C)C(=O)O)C	C31H48O3	15250826	468.71	34	0	0.77	6	3	2	143.15	57.53	4.54	7.7	7.57	5.82	6.75	6.48	-7.2	2.95e-05	6.29e-08	Poorly soluble	-8.75	8.34e-07	1.78e-09	Poorly soluble	-6.08	0.000392	8.36e-07	Poorly soluble	Low	No	No	No	No	Yes	No	No	-3.69	1	3	0	1	1	0.85	0	1	2
5-Desoxyilludosin	Molecule 109	O=CC(=C1CCC1(C)C1CC(CC1O)(C)C)C	C15H24O2	10999004	236.35	17	0	0.8	2	2	1	70.36	37.3	2.71	2.67	3.1	2.63	3.51	2.92	-2.86	0.33	0.00139	Soluble	-3.11	0.186	0.000785	Soluble	-2.85	0.332	0.0014	Soluble	High	Yes	No	No	No	No	No	No	-5.85	0	0	0	0	0	0.55	0	2	1
Lactapiperanol D	Molecule 110	COC1OCC2(C31CC3(C)C1C(C2OC(=O)C)CC(C1)(C)C)O	C18H28O5	10543979	324.41	23	0	0.94	3	5	1	84.06	64.99	2.99	2.07	2.11	2.13	2.35	2.33	-2.96	0.358	0.0011	Soluble	-3.06	0.28	0.000863	Soluble	-2.74	0.589	0.00182	Soluble	High	Yes	No	No	No	No	No	No	-6.81	0	0	0	0	0	0.55	0	0	0
Lactapiperanol A	Molecule 111	COC1OCC2(C31CC3(C)C1CC(CC1C2O)(C)C)O	C16H26O4	10540871	282.38	20	0	1	1	4	2	74.32	58.92	2.81	1.5	1.54	1.81	1.89	1.91	-2.47	0.957	0.00339	Soluble	-2.35	1.28	0.00452	Soluble	-2.11	2.2	0.00778	Soluble	High	Yes	Yes	No	No	No	No	No	-6.96	0	0	0	0	0	0.55	0	0	0
Melleolide K	Molecule 112	O=CC1=CC2CC(CC2C2(C1(O)C(OC(=O)c1c(O)cc(c(c1C)Cl)O)C2)C)(C)C	C23H27ClO6	9910824	434.91	30	6	0.57	4	6	3	113.11	104.06	2.76	5.15	3.92	2.85	4	3.73	-5.66	0.000941	2.16e-06	Moderately soluble	-7.08	3.61e-05	8.31e-08	Poorly soluble	-4.44	0.0158	3.64e-05	Moderately soluble	High	No	Yes	No	No	Yes	No	Yes	-5.3	0	0	0	0	1	0.55	0	1	2
Repraesentin A	Molecule 113	OCC1(C)CC2C(C1)C1(C)CCC1=C(C2)C	C15H24O	102462118	220.35	16	0	0.87	1	1	1	68.04	20.23	2.98	2.73	3.53	3.67	3.67	3.31	-2.86	0.304	0.00138	Soluble	-2.81	0.342	0.00155	Soluble	-3.41	0.0851	0.000386	Soluble	High	Yes	No	No	Yes	No	No	No	-5.71	0	0	0	0	1	0.55	0	1	1
Melledonol	Molecule 114	OCC1=CC2(O)CC(C(C2C2(C1(O)C(OC(=O)c1c(C)cc(cc1O)O)C2)C)O)(C)C	C23H30O8	46882581	434.48	31	6	0.61	4	8	6	111.42	147.68	1.31	1.58	1.14	0.86	1.67	1.31	-3.41	0.17	0.00039	Soluble	-4.29	0.0222	5.1e-05	Moderately soluble	-2.54	1.24	0.00286	Soluble	Low	No	Yes	No	No	No	No	No	-7.83	1	0	1	1	1	0.55	0	1	1
Omphadiol	Molecule 115	OC1C2CC2(C)C2C(CC1(C)C)C(CC2)(C)O	C15H26O2	10105640	238.37	17	0	1	0	2	2	69.72	40.46	2.67	2.54	2.58	2.88	2.49	2.63	-2.92	0.288	0.00121	Soluble	-3.04	0.219	0.000919	Soluble	-2.38	0.998	0.00419	Soluble	High	Yes	No	No	No	No	No	No	-5.95	0	0	0	0	0	0.55	0	0	1
Pyxidatol C	Molecule 116	OCC12CC1CC(CC1C2CCC1(C)O)(C)C	C15H26O2	102027220	238.37	17	0	1	1	2	2	69.72	40.46	2.8	2.48	2.58	2.88	2.77	2.7	-2.81	0.366	0.00153	Soluble	-2.97	0.253	0.00106	Soluble	-2.63	0.564	0.00237	Soluble	High	Yes	No	No	No	No	No	No	-5.99	0	0	0	0	0	0.55	0	0	1
Lepidamine	Molecule 117	O=C1C(=O)C2=C(N)C(=O)CC(C2(C2C1C2(C)C)C)C	C15H19NO3	12050531	261.32	19	0	0.67	0	3	1	70.19	77.23	1.31	1.76	1.24	0.71	2.2	1.45	-2.57	0.705	0.0027	Soluble	-3	0.262	0.001	Soluble	-3.04	0.236	0.000904	Soluble	High	No	No	No	No	No	No	No	-6.64	0	0	0	0	0	0.55	1	1	0
gamma-Butyrolactone	Molecule 118	O=C1CCCO1	C4H6O2	7302	86.09	6	0	0.75	0	2	0	20.51	26.3	1.13	-0.64	0.32	0.09	1.43	0.47	0.03	92.1	1.07	Highly soluble	0.56	313	3.64	Highly soluble	-0.51	26.5	0.308	Soluble	High	No	No	No	No	No	No	No	-7.28	0	3	0	0	2	0.55	0	0	1
1,2,3-Propanetriol	Molecule 119	OCC(CO)O	C3H8O3	753	92.09	6	0	1	2	3	3	20.02	60.69	0.45	-1.76	-1.67	-1.51	-0.96	-1.09	0.83	622	6.76	Highly soluble	1	922	10	Highly soluble	1.08	1110	12	Soluble	High	No	No	No	No	No	No	No	-8.11	0	4	0	0	2	0.55	0	0	1
1-(2-Hydroxyethyl)pyrrolidin-2-one	Molecule 120	OCCN1CCCC1=O	C6H11NO2	76980	129.16	9	0	0.83	2	2	1	37.01	40.54	1.35	-1.09	-0.78	-0.41	0.47	-0.09	0.18	195	1.51	Highly soluble	0.73	691	5.35	Highly soluble	-0.41	50.2	0.389	Soluble	High	No	No	No	No	No	No	No	-7.86	0	3	0	0	1	0.55	0	0	1
1-Deoxy-d-arabitol	Molecule 121	OCC(C(C(O)C)O)O	C5H12O4	270738	136.15	9	0	1	3	4	4	30.8	80.92	0.85	-1.95	-1.92	-1.5	-1.11	-1.13	0.74	752	5.53	Highly soluble	0.77	807	5.93	Highly soluble	1.51	4440	32.6	Soluble	High	No	No	No	No	No	No	No	-8.51	0	3	0	0	1	0.55	0	0	1
Butane, 1,4-dimethoxy-	Molecule 122	COCCCCOC	C6H14O2	518727	118.17	8	0	1	5	2	0	33.13	18.46	2.28	0.65	1.06	0.61	1.07	1.13	-0.65	26.3	0.223	Very soluble	-0.61	28.8	0.244	Very soluble	-1.7	2.34	0.0198	Soluble	High	Yes	No	No	No	No	No	No	-6.56	0	2	0	0	1	0.55	0	0	1
9,12-Octadecadienoic acid (Z,Z)-, 2,3-dihydroxypropyl ester	Molecule 123	CCCCCC=CCC=CCCCCCCCC(=O)OCC(CO)O	C21H38O4		354.52	25	0	0.76	18	4	2	105.72	66.76	4.36	5.79	4.7	3.42	5.94	4.84	-4.5	0.0113	3.18e-05	Moderately soluble	-6.96	3.87e-05	1.09e-07	Poorly soluble	-4.66	0.00777	2.19e-05	Moderately soluble	High	Yes	Yes	Yes	Yes	Yes	Yes	Yes	-4.35	0	0	1	0	2	0.55	0	1	3
Propanamide, 3-cyclopentyl-N-methyl-	Molecule 124	CNC(=O)CCC1CCCC1	C9H17NO	918358	155.24	11	0	0.89	4	1	1	46.26	29.1	2.22	2.03	1.7	1.48	1.87	1.86	-1.82	2.36	0.0152	Very soluble	-2.27	0.836	0.00538	Soluble	-2.22	0.935	0.00603	Soluble	High	Yes	No	No	No	No	No	No	-5.81	0	1	0	0	1	0.55	0	0	1
Propanamide, 3-cyclopentyl-N-ethyl-	Molecule 125	CCNC(=O)CCC1CCCC1	C10H19NO	918357	169.26	12	0	0.9	5	1	1	51.07	29.1	2.45	2.4	2.09	1.78	2.23	2.19	-2.07	1.44	0.00848	Soluble	-2.65	0.377	0.00222	Soluble	-2.63	0.394	0.00233	Soluble	High	Yes	No	No	No	No	No	No	-5.63	0	0	0	0	1	0.55	0	0	1
N-Isobutyl-(6Z,8E)-decadienamide	Molecule 126	CC=CC=CCCCCC(=O)NCC(C)C	C14H25NO	5370490	223.35	16	0	0.64	9	1	1	71.47	29.1	3.5	3.69	3.45	3.08	3.67	3.48	-2.96	0.247	0.00111	Soluble	-3.99	0.0228	0.000102	Soluble	-3.3	0.111	0.000499	Soluble	High	Yes	No	Yes	No	No	No	No	-5.04	0	0	0	0	0	0.55	0	1	3
Anthraergostatetraenol benzoate	Molecule 127	CC(C(C=CC(C1CCC2C1(C)CCc1c2cc2c(c1C)CCC(C2)OC(=O)c1ccccc1)C)C)C	C35H46O2	5379574	498.74	37	12	0.57	7	2	0	156.72	26.3	5.47	10.17	8.64	7.38	9.25	8.18	-9.12	3.81e-07	7.63e-10	Poorly soluble	-10.66	1.1e-08	2.2e-11	Insoluble	-9.33	2.33e-07	4.68e-10	Poorly soluble	Low	No	Yes	No	No	No	No	No	-2.12	1	4	0	1	1	0.55	0	1	2
3-Phenylpropanoic acid, dodec-9-ynyl ester	Molecule 128	CCC#CCCCCCCCCOC(=O)CCc1ccccc1	C21H30O2	561994	314.46	23	6	0.57	12	2	0	98.15	26.3	4.41	6.41	5.39	4.98	6.46	5.53	-5.23	0.00186	5.9e-06	Moderately soluble	-6.76	5.53e-05	1.76e-07	Poorly soluble	-6.99	3.21e-05	1.02e-07	Poorly soluble	High	Yes	No	No	No	No	Yes	No	-3.67	1	0	1	0	1	0.55	0	1	2
n-Hexadecanoic acid	Molecule 129	CCCCCCCCCCCCCCCC(=O)O	C16H32O2	985	256.42	18	0	0.94	14	2	1	80.8	37.3	3.85	7.17	5.55	4.19	5.25	5.2	-5.02	0.00243	9.49e-06	Moderately soluble	-7.77	4.31e-06	1.68e-08	Poorly soluble	-5.31	0.00125	4.88e-06	Moderately soluble	High	Yes	No	Yes	No	Yes	No	No	-2.77	1	0	1	0	1	0.85	0	0	2
Pentadecanoic acid	Molecule 130	CCCCCCCCCCCCCCC(=O)O	C15H30O2	13849	242.4	17	0	0.93	13	2	1	75.99	37.3	3.66	6.63	5.16	3.94	4.81	4.84	-4.66	0.00528	2.18e-05	Moderately soluble	-7.21	1.48e-05	6.1e-08	Poorly soluble	-4.91	0.00298	1.23e-05	Moderately soluble	High	Yes	No	Yes	No	Yes	No	No	-3.07	0	0	1	0	1	0.85	0	0	3
DL-Arabinitol / Arabitol	Molecule 131	OCC(C(C(CO)O)O)O	C5H12O5	94154	152.15	10	0	1	4	5	5	31.96	101.15	0.56	-2.48	-2.95	-2.33	-1.59	-1.76	1.04	1680	11	Highly soluble	0.9	1200	7.91	Highly soluble	2.06	17300	114	Soluble	Low	No	No	No	No	No	No	No	-8.99	0	3	0	0	2	0.55	0	0	1
2-Pyrrolidinone	Molecule 132	O=C1CCCN1	C4H7NO	12025	85.1	6	0	0.75	0	1	1	26.14	29.1	1.06	-0.85	-0.48	-0.31	1.11	0.1	0.17	125	1.47	Highly soluble	0.72	446	5.24	Highly soluble	-0.82	12.9	0.151	Soluble	Low	No	No	No	No	No	No	No	-7.42	0	4	0	0	2	0.55	0	0	1
2(3H)-Furanone,3-(dihydro 2(3H)-furanylidene)dihydro-	Molecule 133	O=C1OCCC1=C1CCCO1	C8H10O3	298789	154.16	11	0	0.62	0	3	0	38.24	35.53	1.56	0.77	1	0.58	2.18	1.22	-1.28	8.07	0.0524	Very soluble	-1.1	12.3	0.0801	Very soluble	-1.42	5.83	0.0378	Soluble	High	Yes	No	No	No	No	No	No	-6.69	0	2	0	0	1	0.85	0	1	1
9,12-Octadecadienoic acid (Z,Z)- or Linoleic acid	Molecule 134	CCCCCC=CCC=CCCCCCCCC(=O)O	C18H32O2	5280450	280.45	20	0	0.72	14	2	1	89.46	37.3	4.14	6.98	5.88	4.47	5.77	5.45	-5.05	0.00249	8.87e-06	Moderately soluble	-7.58	7.42e-06	2.64e-08	Poorly soluble	-4.67	0.00593	2.11e-05	Moderately soluble	High	Yes	No	Yes	No	Yes	No	No	-3.05	1	1	1	1	1	0.85	0	1	2
Hexadecanamide	Molecule 135	CCCCCCCCCCCCCCCC(=O)N	C16H33NO	69421	255.44	18	0	0.94	14	1	1	81.93	43.09	3.87	6.52	4.95	3.79	5.01	4.83	-4.61	0.00631	2.47e-05	Moderately soluble	-7.22	1.53e-05	6e-08	Poorly soluble	-5.53	0.000757	2.96e-06	Moderately soluble	High	Yes	No	Yes	No	No	No	No	-3.23	0	0	1	0	1	0.55	0	0	2
Hexadecanoic acid, 2-hydroxy-1-(hydroxymethyl)ethyl ester	Molecule 136	CCCCCCCCCCCCCCCC(=O)OC(CO)CO	C19H38O4	123409	330.5	23	0	0.95	18	4	2	97.06	66.76	4.5	6.14	4.36	3.18	5.42	4.72	-4.57	0.00891	2.7e-05	Moderately soluble	-7.32	1.57e-05	4.74e-08	Poorly soluble	-5.3	0.00164	4.95e-06	Moderately soluble	High	Yes	No	No	No	No	Yes	No	-3.96	0	0	1	0	2	0.55	0	0	2
Ergost-7-en-3-ol, (3. beta.)	Molecule 137	OC1CCC2(C(C1)CC=C1C2CCC2(C1CCC2C(CCC(C(C)C)C)C)C)C	C28H48O	91691464	400.68	29	0	0.93	5	1	1	128.42	20.23	4.96	8.54	7.63	6.54	6.63	6.86	-7.37	1.69e-05	4.22e-08	Poorly soluble	-8.84	5.82e-07	1.45e-09	Poorly soluble	-5.79	0.000642	1.6e-06	Moderately soluble	Low	No	No	No	No	No	No	No	-2.68	1	2	0	1	2	0.55	0	1	2
gamma.-Ergostenol	Molecule 138	OC1CCC2(C(C1)CC=C1C2CCC2(C1CCC2C(CCC(C(C)C)C)C)C)C	C28H48O	91746604	400.68	29	0	0.93	5	1	1	128.42	20.23	4.96	8.54	7.63	6.54	6.63	6.86	-7.37	1.69e-05	4.22e-08	Poorly soluble	-8.84	5.82e-07	1.45e-09	Poorly soluble	-5.79	0.000642	1.6e-06	Moderately soluble	Low	No	No	No	No	No	No	No	-2.68	1	2	0	1	2	0.55	0	1	2
Stigmasta-3,5-dien-7-one	Molecule 139	CCC(C(C)C)CCC(C1CCC2C1(C)CCC1C2C(=O)C=C2C1(C)CCC=C2)C	C29H46O	12444466	410.67	30	0	0.83	6	1	0	131.79	17.07	4.71	9.51	8.01	6.53	7.22	7.2	-7.98	4.29e-06	1.04e-08	Poorly soluble	-9.78	6.84e-08	1.67e-10	Poorly soluble	-6.42	0.000157	3.83e-07	Poorly soluble	Low	No	No	No	No	Yes	No	No	-2.05	1	3	0	1	2	0.55	0	0	2
Ergosta-5,7,9(11),22-tetraen-3-ol(3. β.,22E)- or Dehydroergosterol	Molecule 140	OC1CCC2(C(=CC=C3C2=CCC2(C3CCC2C(C=CC(C(C)C)C)C)C)C1)C	C28H42O	6436660	394.63	29	0	0.71	4	1	1	127	20.23	4.68	6.86	7.25	6.24	6.43	6.29	-6.34	0.000179	4.52e-07	Poorly soluble	-7.09	3.17e-05	8.04e-08	Poorly soluble	-5.04	0.00357	9.04e-06	Moderately soluble	Low	No	No	No	No	Yes	No	No	-3.84	1	2	0	1	2	0.55	0	1	2
Adipamide	Molecule 141	NC(=O)CCCCC(=O)N	C6H12N2O2	12364	144.17	10	0	0.67	5	2	2	36.77	86.18	0.68	-1.22	-0.48	-0.57	-0.4	-0.4	0.36	334	2.32	Highly soluble	-0.09	116	0.804	Very soluble	-0.66	31.9	0.221	Soluble	High	No	No	No	No	No	No	No	-8.05	0	3	0	0	1	0.55	0	0	1
3-Phenylpropanoic acid, dodec-9-ynyl ester	Molecule 142	CCCCCCCC(=O)P(=O)(OCC)OCC	C12H25O4P	221565	264.3	17	0	0.92	11	4	0	70.83	62.41	3.48	2.98	4.14	1.72	2.56	2.97	-2.63	0.62	0.00234	Soluble	-3.95	0.0294	0.000111	Soluble	-3.73	0.0492	0.000186	Soluble	High	Yes	No	No	No	No	No	No	-5.8	0	0	1	0	0	0.55	0	1	1
Ergosta-5,7,22-trien-3-ol, (3.β.,22E)-	Molecule 143	OC1CCC2(C(=CC=C3C2CCC2(C3CCC2C(C=CC(C(C)C)C)C)C)C1)C	C28H44O	6432563	396.65	29	0	0.79	4	1	1	127.47	20.23	4.92	7.43	7.33	6.33	6.44	6.49	-6.72	7.63e-05	1.92e-07	Poorly soluble	-7.69	8.17e-06	2.06e-08	Poorly soluble	-5.06	0.00345	8.69e-06	Moderately soluble	Low	No	No	No	No	Yes	No	No	-3.44	1	2	0	1	2	0.55	0	1	2
Octanoic acid, 2-phenylethyl ester	Molecule 144	CCCCCCCC(=O)OCCc1ccccc1	C16H24O2	229888	248.36	18	6	0.56	10	2	0	75.96	26.3	3.37	5.13	4.13	3.9	4.71	4.25	-4.2	0.0157	6.33e-05	Moderately soluble	-5.43	0.000929	3.74e-06	Moderately soluble	-5.72	0.000477	1.92e-06	Moderately soluble	High	Yes	No	No	Yes	No	Yes	No	-4.17	0	0	0	0	1	0.55	0	0	3
Methyl 2-hydroxy-tetracosanoate	Molecule 145	CCCCCCCCCCCCCCCCCCCCCCC(C(=O)OC)O	C25H50O3	3584311	398.66	28	0	0.96	23	3	1	124.74	46.53	5.85	11.04	7.73	5.33	8.62	7.71	-7.75	7.11e-06	1.78e-08	Poorly soluble	-11.98	4.13e-10	1.04e-12	Insoluble	-8.24	2.29e-06	5.74e-09	Poorly soluble	Low	No	No	Yes	No	No	No	No	-0.89	1	2	1	1	2	0.55	0	0	3
Methyl Octadeca-9,12-dienoate	Molecule 146	CCCCCC=CCC=CCCCCCCCC(=O)OC	C19H34O2	8203	294.47	21	0	0.74	15	2	0	93.78	26.3	4.61	6.82	5.97	4.7	6.36	5.69	-4.97	0.00314	1.07e-05	Moderately soluble	-7.18	1.94e-05	6.6e-08	Poorly soluble	-5.37	0.00125	4.25e-06	Moderately soluble	High	No	No	Yes	No	Yes	No	No	-3.25	1	1	1	1	1	0.55	0	1	2
Tetradecanoic acid or (Myristic acid)	Molecule 147	CCCCCCCCCCCCCC(=O)O	C14H28O2	11005	228.37	16	0	0.93	12	2	1	71.18	37.3	3.32	6.11	4.77	3.69	4.37	4.45	-4.31	0.0111	4.86e-05	Moderately soluble	-6.67	4.83e-05	2.11e-07	Poorly soluble	-4.51	0.00712	3.12e-05	Moderately soluble	High	Yes	No	Yes	No	No	No	No	-3.35	0	0	1	0	1	0.85	0	0	3
3-Cyclopentylpropionic acid, 2-dimethylaminoethyl ester	Molecule 148	CN(CCOC(=O)CCC1CCCC1)C	C12H23NO2	91693811	213.32	15	0	0.92	7	3	0	61.86	29.54	2.78	2.64	2.06	1.88	2.11	2.3	-2.36	0.923	0.00433	Soluble	-2.91	0.262	0.00123	Soluble	-2.46	0.733	0.00344	Soluble	High	Yes	No	No	No	No	No	No	-5.73	0	0	0	0	0	0.55	0	0	1
2(3H)-Furanone, 3-(dihydro-2(3H)-furanylidene)dihydro-	Molecule 149	O=C1OCCC1=C1CCCO1	C8H10O3	298789	154.16	11	0	0.62	0	3	0	38.24	35.53	1.56	0.77	1	0.58	2.18	1.22	-1.28	8.07	0.0524	Very soluble	-1.1	12.3	0.0801	Very soluble	-1.42	5.83	0.0378	Soluble	High	Yes	No	No	No	No	No	No	-6.69	0	2	0	0	1	0.85	0	1	1
N-Isobutyl-(6Z,8E)-decadienamide	Molecule 150	CC=CC=CCCCCC(=O)NCC(C)C	C14H25NO	5370490	223.35	16	0	0.64	9	1	1	71.47	29.1	3.5	3.69	3.45	3.08	3.67	3.48	-2.96	0.247	0.00111	Soluble	-3.99	0.0228	0.000102	Soluble	-3.3	0.111	0.000499	Soluble	High	Yes	No	Yes	No	No	No	No	-5.04	0	0	0	0	0	0.55	0	1	3
Propanamide, 3-cyclopentyl-N-pentyl-	Molecule 151	CCC(=O)N	C3H7NO	6578	73.09	5	0	0.67	1	1	1	19.44	43.09	0.82	-0.66	-0.12	-0.37	-0.46	-0.16	0.19	113	1.54	Highly soluble	0.23	124	1.69	Highly soluble	-0.12	54.8	0.75	Soluble	High	No	No	No	No	No	No	No	-7.21	0	3	0	0	2	0.55	0	0	1
9-Octadecenamide, (Z)-	Molecule 152	CCCCCCCCC=CCCCCCCCC(=O)N	C18H35NO	1930	281.48	20	0	0.83	15	1	1	91.07	43.09	4.22	6.99	5.51	4.16	5.71	5.32	-5	0.00282	1e-05	Moderately soluble	-7.71	5.49e-06	1.95e-08	Poorly soluble	-5.61	0.000689	2.45e-06	Moderately soluble	High	Yes	No	Yes	No	Yes	No	No	-3.05	1	0	1	0	1	0.55	0	1	2
Oxalic acid, hexadecyl 2-phenylethyl ester	Molecule 153	CCCCCCCCOC(=O)C(=O)OCCc1ccccc1	C18H26O4	6421911	306.4	22	6	0.56	13	4	0	86.85	52.6	4.11	5.78	3.68	3.37	4.66	4.32	-4.72	0.00577	1.88e-05	Moderately soluble	-6.65	6.8e-05	2.22e-07	Poorly soluble	-5.79	0.000495	1.61e-06	Moderately soluble	High	Yes	No	Yes	Yes	No	No	No	-4.07	0	0	1	0	1	0.55	0	2	2
Glutaric acid, tridec-2-yn-1-yl 2-ethylhexyl ester	Molecule 154	OC(=O)CCCC(=O)O	C5H8O4	743	132.11	9	0	0.6	4	4	2	29.69	74.6	0.45	-0.29	0.33	-0.13	-0.29	0.01	-0.21	81	0.613	Very soluble	-0.82	20.1	0.152	Very soluble	0.19	206	1.56	Soluble	High	No	No	No	No	No	No	No	-7.31	0	3	0	0	1	0.85	0	0	1
ERGOST-7-EN-3-OL, (3.BETA.)-	Molecule 155	OC1CCC2(C(C1)CC=C1C2CCC2(C1CCC2C(CCC(C(C)C)C)C)C)C	C28H48O	91691464	400.68	29	0	0.93	5	1	1	128.42	20.23	4.96	8.54	7.63	6.54	6.63	6.86	-7.37	1.69e-05	4.22e-08	Poorly soluble	-8.84	5.82e-07	1.45e-09	Poorly soluble	-5.79	0.000642	1.6e-06	Moderately soluble	Low	No	No	No	No	No	No	No	-2.68	1	2	0	1	2	0.55	0	1	2
STIGMASTA-5,22-DIEN-3-OL, (3.BETA.,22E)-	Molecule 156	CCC(C(C)C)C=CC(C1CCC2C1(C)CCC1C2CC=C2C1(C)CCC(C2)O)C	C29H48O	6432745	412.69	30	0	0.86	5	1	1	132.75	20.23	5.01	8.56	7.8	6.62	6.86	6.97	-7.46	1.43e-05	3.46e-08	Poorly soluble	-8.86	5.71e-07	1.38e-09	Poorly soluble	-5.47	0.0014	3.39e-06	Moderately soluble	Low	No	No	No	No	Yes	No	No	-2.74	1	3	0	1	2	0.55	0	1	2
[truncated: 1 more columns]
